# Supplementary material for: Size and surface-engineered BiVO4 catalytic smooth spheres for efficient electrochemical detection of bifenox herbicide
Source: Royal Society of Chemistry journal article supplement (doi:10.1039/d3nj01533e), 2023-01-01
Supplement: d3nj01533e1.pdf [file d3nj01533e1.pdf]

**Supplementary**

**Size and surface-engineered BiVO<sub>4</sub> catalytic smooth spheres for efficient  
electrochemical detection of bifenoX herbicide**

Thangaraju Dheivasigamani,<sup>1\*</sup> Kumaravel Ammasai,<sup>2\*</sup> Priyadharshini Shanmugam,<sup>1</sup>  
Govarthini Seerangan Selvam,<sup>1</sup> Durairajan Arulmozhi,<sup>3</sup>

<sup>1</sup>*nano-crystal Design and Application Lab (n-DAL), Department of Physics, PSG Institute of  
Technology and Applied Research, Coimbatore-641062, Tamil Nadu, India*

<sup>2</sup>*Functional Materials Lab (FML), Department of Chemistry, PSG Institute of Technology and  
Applied Research, Coimbatore-641062, Tamil Nadu, India*

<sup>3</sup>*INAveiro, Department of Physics, University of Aveiro, 3810 193 Aveiro, Portugal*

*Corresponding author*

\*E-mail: [dthangaraju@gmail.com](mailto:dthangaraju@gmail.com) (Thangaraju Dheivasigamani)

\*E-mail: [kumaravel@psgitech.ac.in](mailto:kumaravel@psgitech.ac.in) (Kumaravel Ammasai)

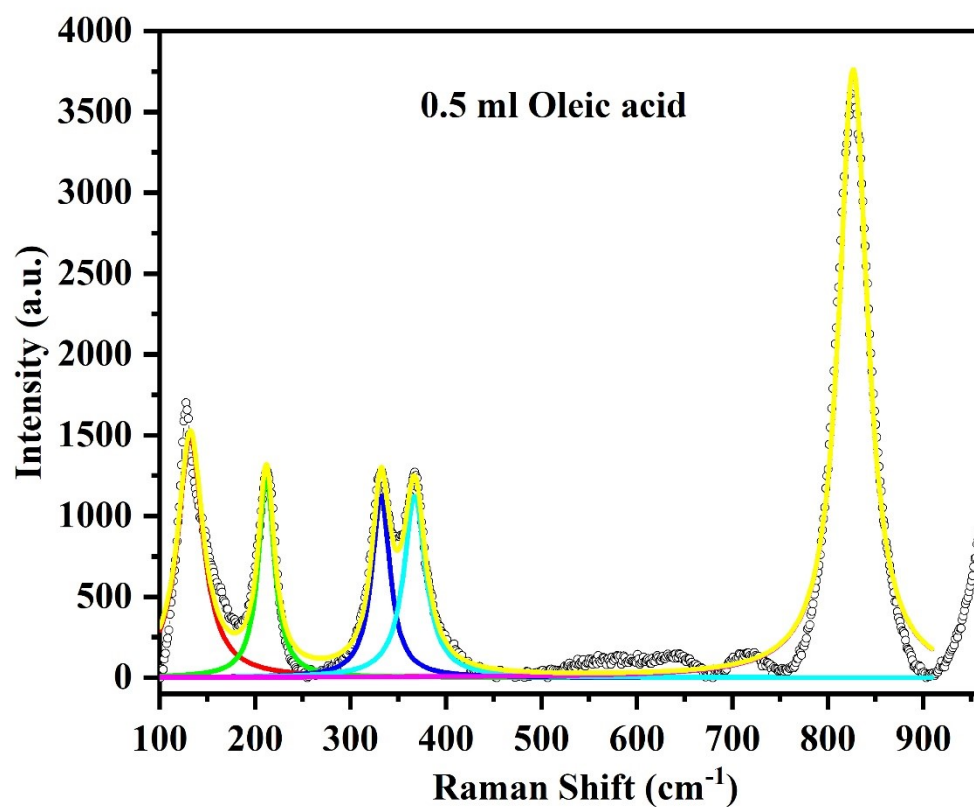

S1. Deconvoluted Raman spectra of BiVO<sub>4</sub> sample synthesized with 0.5 ml of oleic acid.

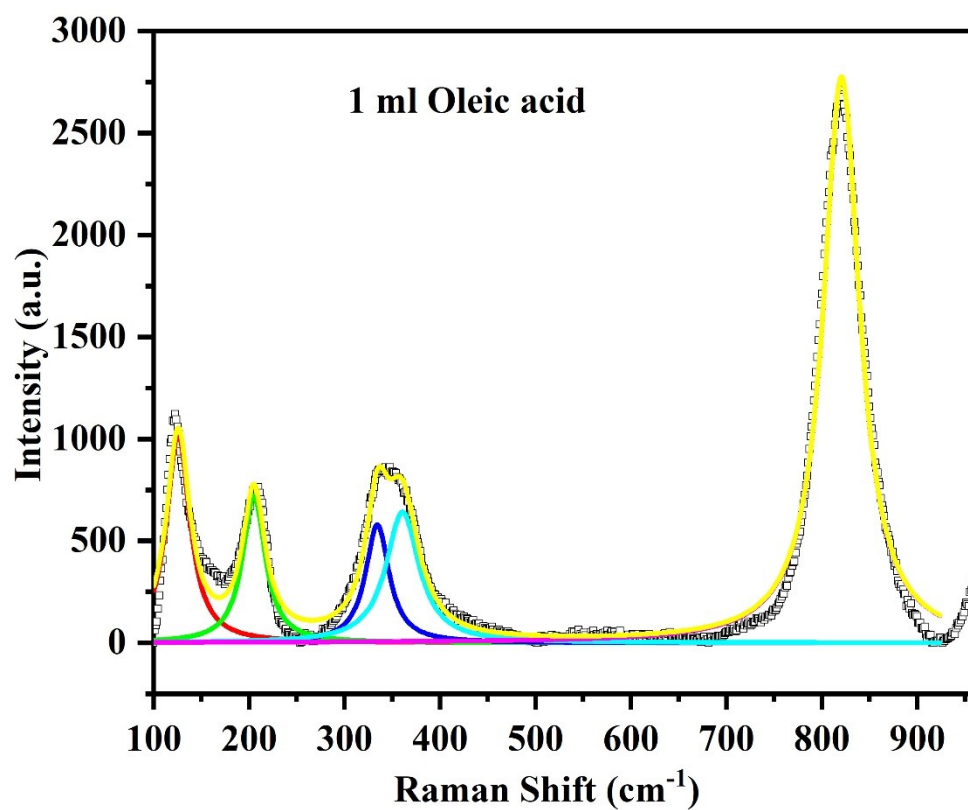

S2. Deconvoluted Raman spectra of  $\text{BiVO}_4$  sample synthesized with 1 ml of oleic acid.
